# Supplementary material
Source: PubMed Central journal article supplement (PMC3372847)
Supplement: bph0165-2000-SD1.pdf [file bph0165-2000-SD1.pdf]

## Supplemental Information

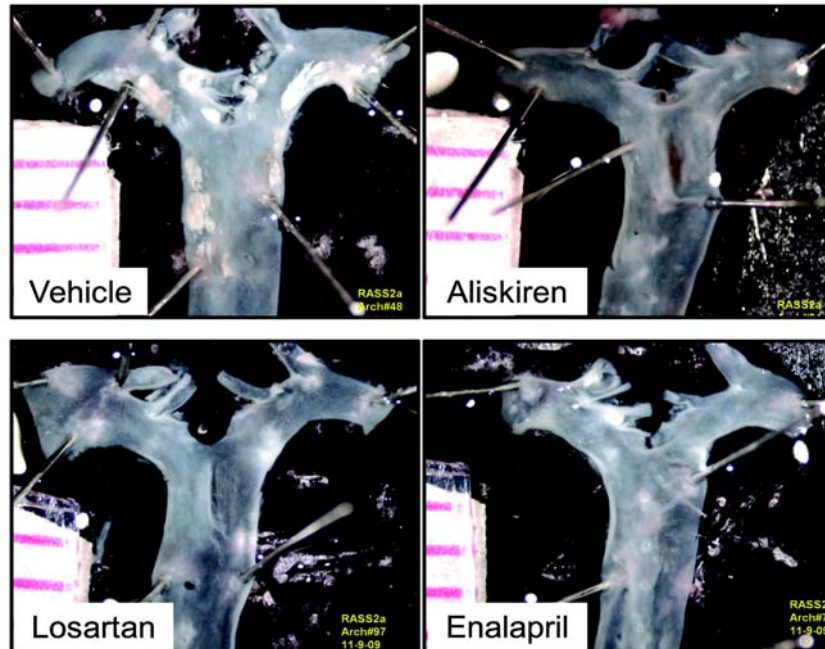

**Figure I. Representative en face images of aortic arches that were used for quantification of atherosclerotic lesions.** Images are provided for examples of atherosclerosis in mice infused with PBS, aliskiren  $25 \text{ mg}\cdot\text{kg}^{-1}\cdot\text{d}^{-1}$ , enalapril  $2.5 \text{ mg}\cdot\text{kg}^{-1}\cdot\text{d}^{-1}$ , or losartan  $25 \text{ mg}\cdot\text{kg}^{-1}\cdot\text{d}^{-1}$ .

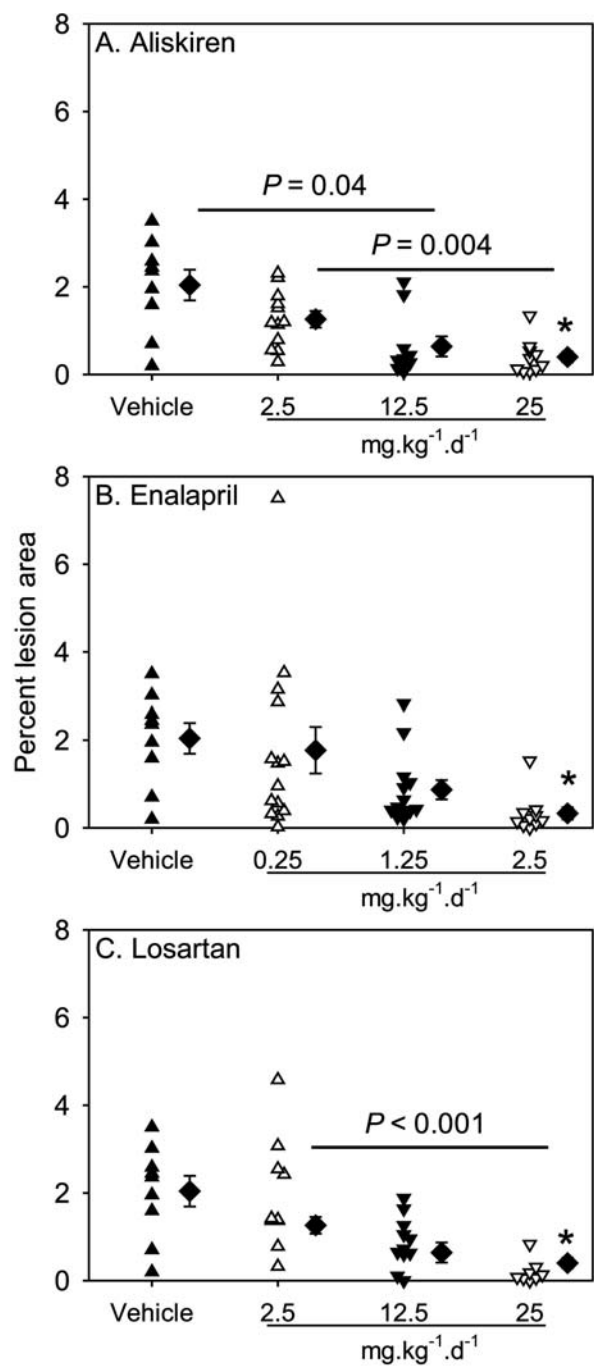

**Figure II. Comparison of RAS inhibition on atherosclerotic lesions in thoracic aorta.** Percent lesion area was measured on the intimal surface of thoracic aortas ( $n = 8 - 14$  per group). Triangles represent the values for individual mice, diamonds represent means, and bars are SEM. \* denotes  $P < 0.001$  versus the vehicle.

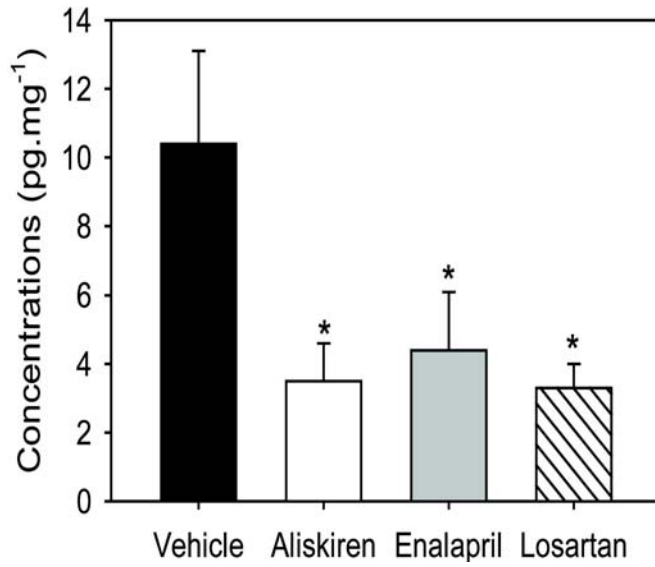

**Figure III. Comparison of RAS inhibition on renal AngII concentrations.** Renal AngII concentrations ( $n = 5$  per group) were measured using radioimmuno-assay method. Histograms represent means and bars represent SEM. \* denotes  $P < 0.05$  versus the vehicle.
